# Supplementary material
Source: PubMed Central journal article supplement (PMC7806549)
Supplement: 216_2020_3031_MOESM1_ESM.pdf [file 216_2020_3031_MOESM1_ESM.pdf]

## **Analytical and Bioanalytical Chemistry**

### **Electronic Supplementary Material**

#### **Development and validation of a sensitive liquid chromatography tandem mass spectrometry assay for the simultaneous determination of ten kinase inhibitors in human serum and plasma**

Fatemeh Aghai, Sebastian Zimmermann, Max Kurlbaum, Pius Jung, Theo Pelzer,  
Hartwig Klinker, Nora Isberner, Oliver Scherf-Clavel

**Table S1** Chemical structure of the analytes. Mass transitions of analyte and internal standard were achieved by optimizing the parameters for ionization, fragmentation, and MRM-detection. Colored atoms indicate where protons/carbon-atoms are substituted by  $^2\text{H}/^{13}\text{C}$  in the stable isotope labeled internal standards

| <b>Afatinib (AFA)</b>                                                               |               |
|-------------------------------------------------------------------------------------|---------------|
| 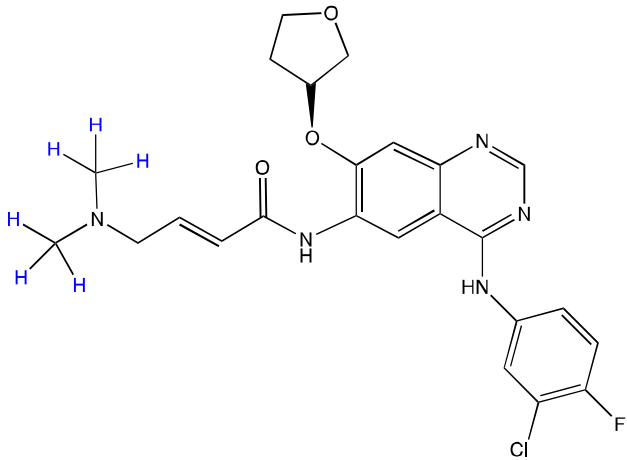   |               |
| Mass transition analyte                                                             | 486.0 → 371.0 |
| Mass transition isotopically marked internal standard                               | 492.1 → 371.0 |
| Retention time ( $R_t$ ) (min)                                                      | 3.04          |
| Declustering potential (volts)                                                      | 100.0         |
| Entrance potential (volts)                                                          | 5.0           |
| Collision energy (volts)                                                            | 34.0          |
| Collision cell exit potential (volts)                                               | 11.0          |
| <b>Axitinib (AXI)</b>                                                               |               |
|  |               |
| Mass transition analyte                                                             | 387.1 → 356.0 |
| Mass transition isotopically marked internal standard                               | 391.3 → 356.1 |
| Retention time ( $R_t$ ) (min)                                                      | 1.84          |
| Declustering potential (volts)                                                      | 80.0          |
| Entrance potential (volts)                                                          | 6.0           |
| Collision energy (volts)                                                            | 27.0          |
| Collision cell exit potential (volts)                                               | 16.0          |

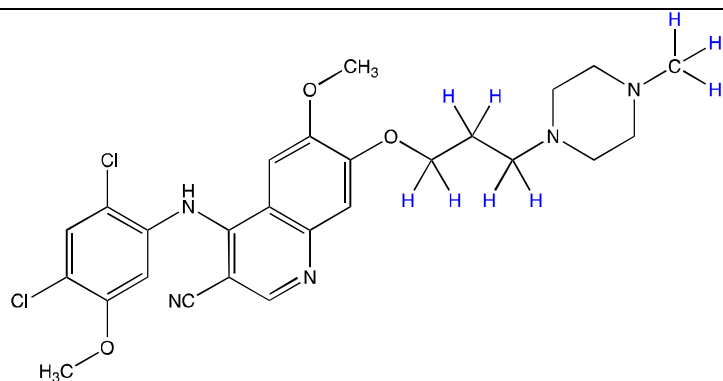

**Bosutinib (BOS)**

|                                                       |               |
|-------------------------------------------------------|---------------|
| Mass transition analyte                               | 530.4 → 141.3 |
| Mass transition isotopically marked internal standard | 539.4 → 150.3 |
| Retention time (R <sub>t</sub> ) (min)                | 2.82          |
| Declustering potential (volts)                        | 80.0          |
| Entrance potential (volts)                            | 10.0          |
| Collision energy (volts)                              | 22.0          |
| Collision cell exit potential (volts)                 | 14.0          |

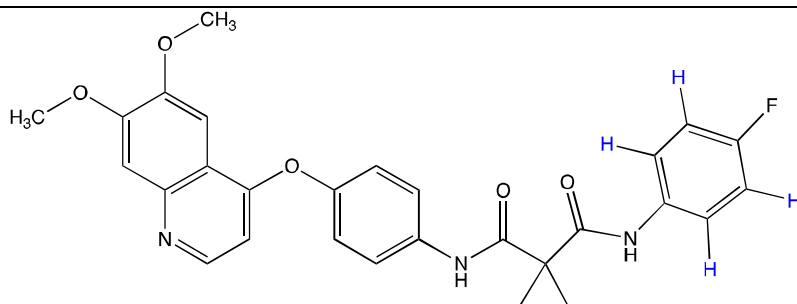

**Cabozantinib (CAB)**

|                                                       |               |
|-------------------------------------------------------|---------------|
| Mass transition analyte                               | 502.2 → 323.1 |
| Mass transition isotopically marked internal standard | 506.4 → 391.4 |
| Retention time (R <sub>t</sub> ) (min)                | 3.42          |
| Declustering potential (volts)                        | 50.0          |
| Entrance potential (volts)                            | 10.0          |
| Collision energy (volts)                              | 35.0          |
| Collision cell exit potential (volts)                 | 14.0          |

---

**Dabrafenib (DAB)**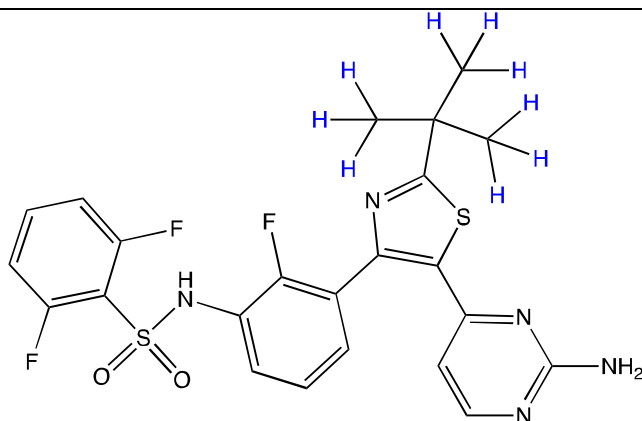

---

|                                                       |               |
|-------------------------------------------------------|---------------|
| Mass transition analyte                               | 520.1 → 307.1 |
| Mass transition isotopically marked internal standard | 529.0 → 316.1 |
| Retention time (R <sub>t</sub> ) (min)                | 1.50          |
| Declustering potential (volts)                        | 80.0          |
| Entrance potential (volts)                            | 10.0          |
| Collision energy (volts)                              | 30.0          |
| Collision cell exit potential (volts)                 | 14.0          |

---

---

**Lenvatinib (LEN)**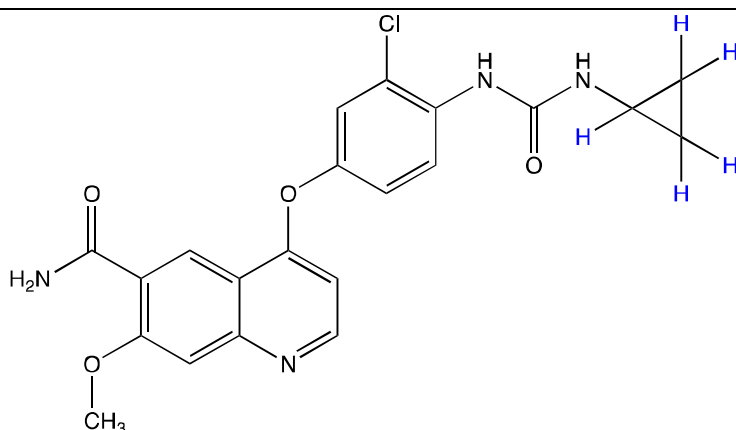

---

|                                                       |               |
|-------------------------------------------------------|---------------|
| Mass transition analyte                               | 428.1 → 371.0 |
| Mass transition isotopically marked internal standard | 433.1 → 371.0 |
| Retention time (R <sub>t</sub> ) (min)                | 1.55          |
| Declustering potential (volts)                        | 50.0          |
| Entrance potential (volts)                            | 10.0          |
| Collision energy (volts)                              | 43.0          |
| Collision cell exit potential (volts)                 | 14.0          |

---

---

**Nilotinib (NIL)**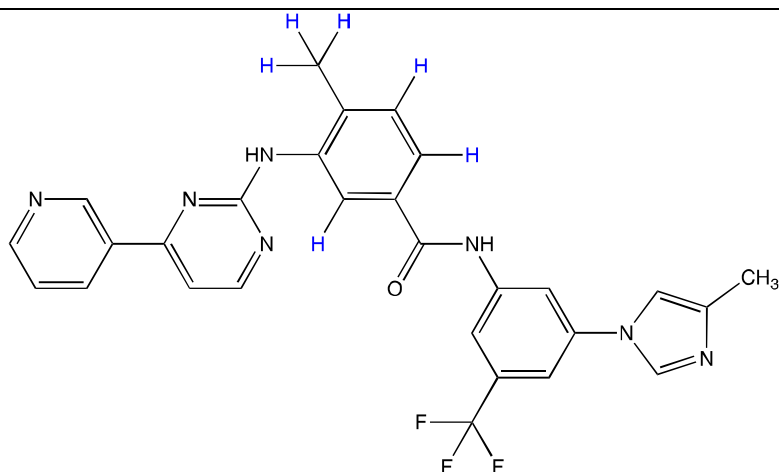

---

|                                                       |               |
|-------------------------------------------------------|---------------|
| Mass transition analyte                               | 530.0 → 289.1 |
| Mass transition isotopically marked internal standard | 536.1 → 295.0 |
| Retention time (R <sub>t</sub> ) (min)                | 3.30          |
| Declustering potential (volts)                        | 100.0         |
| Entrance potential (volts)                            | 10.0          |
| Collision energy (volts)                              | 30.0          |
| Collision cell exit potential (volts)                 | 14.0          |

---

---

**Osimertinib (OSI)**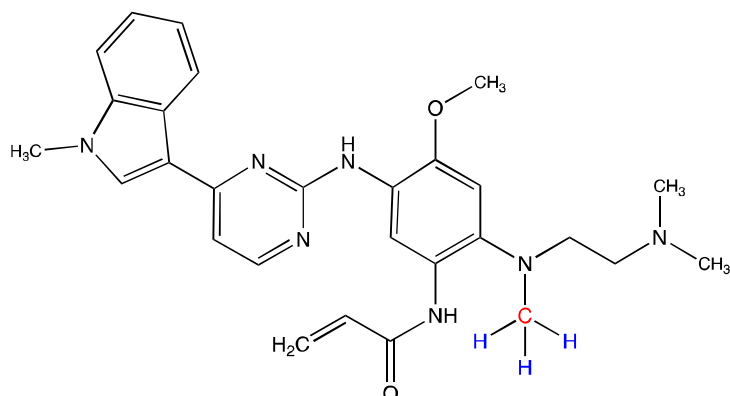

---

|                                                       |              |
|-------------------------------------------------------|--------------|
| Mass transition analyte                               | 500.2 → 72.1 |
| Mass transition isotopically marked internal standard | 504.2 → 72.0 |
| Retention time (R <sub>t</sub> ) (min)                | 3.81         |
| Declustering potential (volts)                        | 50.0         |
| Entrance potential (volts)                            | 10.0         |
| Collision energy (volts)                              | 47.0         |
| Collision cell exit potential (volts)                 | 14.0         |

---

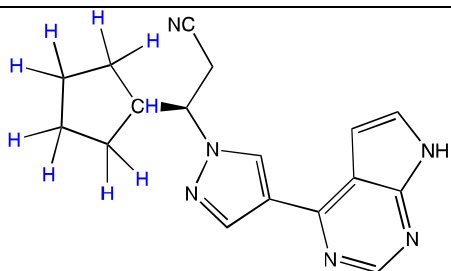


---

**Ruxolitinib (RUX)**

|                                                       |               |
|-------------------------------------------------------|---------------|
| Mass transition analyte                               | 307.0 → 186.0 |
| Mass transition isotopically marked internal standard | 316.0 → 186.0 |
| Retention time (R <sub>t</sub> ) (min)                | 1.24          |
| Declustering potential (volts)                        | 80.0          |
| Entrance potential (volts)                            | 10.0          |
| Collision energy (volts)                              | 30.0          |
| Collision cell exit potential (volts)                 | 14.0          |

---

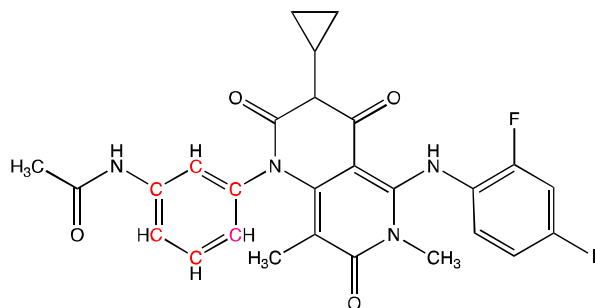


---

**Trametinib (TRA)**

|                                                       |               |
|-------------------------------------------------------|---------------|
| Mass transition analyte                               | 616.0 → 490.9 |
| Mass transition isotopically marked internal standard | 622.0 → 496.9 |
| Retention time (R <sub>t</sub> ) (min)                | 3.89          |
| Declustering potential (volts)                        | 125.0         |
| Entrance potential (volts)                            | 7.0           |
| Collision energy (volts)                              | 46.0          |
| Collision cell exit potential (volts)                 | 12.0          |

---

**Table S2** Validation results for sensitivity, selectivity, carry-over and dilution integrity (with saline solution)

| Analyte | Sensitivity (n=9)              | S/N-ratio <sup>b</sup><br>(n=9) | Selectivity<br>(n=6)<br>(analyte) | Selectivity<br>(n=6)<br>(IS) | Carry-over (n = 5)<br>(analyte) | Carry-over (n =<br>5) (IS) | Dilution integrity (n = 6) |      |
|---------|--------------------------------|---------------------------------|-----------------------------------|------------------------------|---------------------------------|----------------------------|----------------------------|------|
|         | Acceptance Factor <sup>a</sup> | - <sup>b</sup>                  | (%)                               | (%)                          | (%)                             | (%)                        | Accuracy (%)               | CV%  |
| AFA     | 0.25 ± 0.20 (0.05-0.84)        | 20.7 ± 5.7                      | 1.75                              | 0.19                         | 6.83                            | 0.05                       | 102.0 ± 1.33               | 1.39 |
| AXI     | 0.13 ± 0.07 (0.01-0.31)        | 77.0 ± 32.6                     | 0.15                              | 0.01                         | 1.84                            | 0.01                       | 88.4 ± 4.02                | 3.70 |
| BOS     | 0.35 ± 0.24 (0.09-0.91)        | 11.9 ± 4.4                      | 3.52                              | 0.05                         | 3.36                            | 0.02                       | 95.0 ± 2.77                | 2.82 |
| CAB     | 0.14 ± 0.10 (0.02-0.34)        | 51.6 ± 18.7                     | 2.79                              | 0.11                         | 4.06                            | 0.08                       | 89.9 ± 2.21                | 2.20 |
| DAB     | 0.06 ± 0.03 (0.02-0.14)        | 34.9 ± 12.6                     | 0.65                              | 0.08                         | 0.48                            | 0.01                       | 94.1 ± 2.64                | 2.80 |
| LEN     | 0.02 ± 0.02 (0.01-0.08)        | 46.5 ± 14.0                     | 0.23                              | 0.03                         | 0.84                            | 0.02                       | 100.0 ± 2.15               | 2.39 |
| NIL     | 0.20 ± 0.18 (0.02-0.86)        | 47.5 ± 19.1                     | 2.60                              | 0.23                         | 7.33                            | 0.05                       | 98.0 ± 3.35                | 3.53 |
| OSI     | 0.03 ± 0.01 (0.01-0.06)        | 25.2 ± 10.3                     | 1.35                              | 0.26                         | 12.3                            | 0.16                       | 109.0 ± 4.31               | 4.87 |
| RUX     | 0.03 ± 0.02 (0.01-0.11)        | 79.4 ± 33.5                     | 0.28                              | 0.30                         | 0.71                            | 0.36                       | 109.0 ± 2.36               | 2.32 |
| TRA     | 0.04 ± 0.04 (0.02-0.16)        | 47.0 ± 18.9                     | 0.31                              | 0.004                        | 0.94                            | 0.01                       | 95.4 ± 1.91                | 1.75 |

<sup>a</sup> mean ± SD (range)<sup>b</sup> S/N-ratios calculated for the lowest calibration level expressed as mean ± SD

**Table S3** Accuracy and precision of quality control (QC) samples prepared in hemolytic, icteric and lipemic serum, quantified against a calibration curve prepared in plasma (n = 2)

| Analyte | Sample  | Accuracy (%) | CV (%) | Accuracy (%) | CV (%) | Accuracy (%) | CV (%) |
|---------|---------|--------------|--------|--------------|--------|--------------|--------|
|         |         | Hemolytic    |        | Icteric      |        | Lipemic      |        |
| AFA     | QC high | 96.1 ± 4.90  | 5.10   | 102.3 ± 7.36 | 7.19   | 101.2 ± 0.95 | 0.94   |
|         | QC low  | 99.4 ± 0.84  | 0.84   | 92.8 ± 3.35  | 3.61   | 92.3 ± 6.78  | 7.35   |
| AXI     | QC high | 88.1 ± 0.44  | 0.50   | 96.3 ± 0.59  | 0.61   | 93.7 ± 0.15  | 0.16   |
|         | QC low  | 96.5 ± 1.71  | 1.77   | 96.6 ± 1.00  | 1.04   | 92.1 ± 8.12  | 8.81   |
| BOS     | QC high | 95.9 ± 4.17  | 4.35   | 99.6 ± 1.34  | 1.35   | 99.8 ± 0.45  | 0.45   |
|         | QC low  | 89.4 ± 6.5   | 7.28   | 90.5 ± 5.08  | 5.61   | 88.6 ± 7.62  | 8.60   |
| CAB     | QC high | 90.2 ± 2.42  | 2.67   | 96 ± 2.91    | 3.03   | 92.6 ± 2.90  | 3.14   |
|         | QC low  | 96.6 ± 0.99  | 1.03   | 91.4 ± 0.99  | 1.09   | 92.1 ± 2.65  | 2.87   |
| DAB     | QC high | 100.2 ± 1.49 | 1.49   | 103 ± 0.49   | 0.48   | 104 ± 2.98   | 2.87   |
|         | QC low  | 105.2 ± 6.44 | 6.12   | 100.2 ± 2.03 | 2.03   | 102.1 ± 2.71 | 2.66   |
| LEN     | QC high | 103.9 ± 8.89 | 8.56   | 110 ± 3.95   | 3.59   | 110.5 ± 1.27 | 1.15   |
|         | QC low  | 104.8 ± 5.77 | 5.51   | 96 ± 5.87    | 6.11   | 94.6 ± 0.96  | 1.02   |
| NIL     | QC high | 95.6 ± 0.99  | 1.03   | 103 ± 2.47   | 2.40   | 102.2 ± 0.49 | 0.48   |
|         | QC low  | 96.3 ± 1.35  | 1.41   | 94.8 ± 2.71  | 2.86   | 94.8 ± 2.03  | 2.14   |
| OSI     | QC high | 99.2 ± 0.00  | 0.00   | 97.5 ± 1.18  | 1.21   | 109.6 ± 5.30 | 4.84   |
|         | QC low  | 100.6 ± 0.82 | 0.82   | 101.5 ± 1.23 | 1.22   | 96.5 ± 1.64  | 1.70   |
| RUX     | QC high | 92.2 ± 3.72  | 4.03   | 91.6 ± 3.12  | 3.41   | 93.8 ± 2.08  | 2.22   |
|         | QC low  | 99.1 ± 3.24  | 3.27   | 95 ± 7.90    | 8.32   | 96.8 ± 2.74  | 2.82   |
| TRA     | QC high | 95.1 ± 1.30  | 1.36   | 100 ± 0.14   | 0.14   | 98.2 ± 1.30  | 1.32   |
|         | QC low  | 94.2 ± 3.05  | 3.24   | 89.3 ± 1.57  | 1.76   | 88.4 ± 1.67  | 1.89   |



**Table S4** Accuracy and precision of quality control (QC) samples prepared in serum, quantified against a calibration curve prepared in plasma (n = 3)

| Analyte | Sample  | Accuracy (%) | CV (%) |
|---------|---------|--------------|--------|
| AFA     | QC high | 100.4 ± 2.33 | 2.32   |
|         | QC low  | 99.3 ± 0.76  | 0.77   |
| AXI     | QC high | 96.5 ± 2.18  | 2.26   |
|         | QC low  | 97.7 ± 1.29  | 1.32   |
| BOS     | QC high | 104.7 ± 3.06 | 2.92   |
|         | QC low  | 97.9 ± 3.91  | 3.99   |
| CAB     | QC high | 96.2 ± 2.75  | 2.86   |
|         | QC low  | 99.8 ± 1.95  | 1.95   |
| DAB     | QC high | 101.9 ± 3.70 | 3.63   |
|         | QC low  | 100.4 ± 4.37 | 4.35   |
| LEN     | QC high | 98.4 ± 2.21  | 2.25   |
|         | QC low  | 92.3 ± 0.61  | 0.66   |
| NIL     | QC high | 101.9 ± 3.10 | 3.04   |
|         | QC low  | 98.2 ± 5.10  | 5.20   |
| OSI     | QC high | 103.0 ± 3.00 | 2.91   |
|         | QC low  | 101.0 ± 0.45 | 0.45   |
| RUX     | QC high | 98.8 ± 2.02  | 2.04   |
|         | QC low  | 97.0 ± 6.02  | 6.21   |
| TRA     | QC high | 103.2 ± 4.31 | 4.18   |
|         | QC low  | 97.33 ± 2.93 | 3.01   |

**Table S5** Validation results for freeze-thaw stability cycles and long-term stability (n = 3)

| Analyte          | QC level | <i>Freeze-thaw cycle 1</i> |      | <i>Freeze-thaw cycle 2</i> |      | <i>Freeze-thaw cycle 3</i> |      | <i>Long-term stability<br/>-20 °C (3 months)</i> |      | <i>Long-term stability<br/>-80 °C (3 months)</i> |      |
|------------------|----------|----------------------------|------|----------------------------|------|----------------------------|------|--------------------------------------------------|------|--------------------------------------------------|------|
|                  |          | Accuracy (%)               | CV%  | Accuracy (%)               | CV%  | Accuracy (%)               | CV%  | Accuracy (%)                                     | CV%  | Accuracy (%)                                     | CV%  |
| AFA              | QC-H     | 106.6 ± 3.98               | 3.73 | 106.2 ± 3.28               | 3.09 | 105.9 ± 2.26               | 2.14 | 86.2 ± 4.66                                      | 5.40 | 102.1 ± 1.83                                     | 1.79 |
|                  | QC-L     | 107.9 ± 6.57               | 6.09 | 108.5 ± 6.11               | 5.63 | 111.7 ± 3.32               | 2.97 | 103.4 ± 0.00                                     | 0.00 | 107.8 ± 4.57                                     | 4.24 |
| AXI              | QC-H     | 95.6 ± 1.94                | 2.02 | 95.9 ± 1.47                | 1.53 | 102.6 ± 1.68               | 1.64 | 91.3 ± 4.68                                      | 5.13 | 99.4 ± 0.70                                      | 0.71 |
|                  | QC-L     | 97.4 ± 1.45                | 0.98 | 102.3 ± 1.45               | 1.41 | 97.6 ± 1.12                | 1.15 | 104.8 ± 0.13                                     | 0.12 | 105.0 ± 5.72                                     | 5.45 |
| BOS              | QC-H     | 105.4 ± 1.73               | 1.64 | 103.9 ± 3.22               | 3.10 | 106.3 ± 0.79               | 0.75 | 96.3 ± 8.26                                      | 8.58 | 104.7 ± 3.94                                     | 3.77 |
|                  | QC-L     | 101.2 ± 2.04               | 2.01 | 99.4 ± 0.74                | 0.74 | 101.2 ± 5.04               | 4.98 | 101.8 ± 2.34                                     | 2.30 | 105.0 ± 6.21                                     | 5.92 |
| CAB              | QC-H     | 98.2 ± 4.50                | 4.58 | 98.5 ± 2.05                | 2.09 | 99.6 ± 2.16                | 2.17 | 89.7 ± 4.57                                      | 5.10 | 97.9 ± 2.02                                      | 2.07 |
|                  | QC-L     | 103.5 ± 1.48               | 1.43 | 102.8 ± 2.89               | 2.81 | 105.6 ± 1.96               | 1.86 | 103.7 ± 1.27                                     | 1.22 | 102.0 ± 3.70                                     | 3.63 |
| DAB              | QC-H     | 98.1 ± 2.47                | 2.52 | 98.4 ± 1.26                | 1.28 | 100.3 ± 3.33               | 3.32 | 92.4 ± 8.79                                      | 9.51 | 100.1 ± 0.95                                     | 0.95 |
|                  | QC-L     | 98.5 ± 6.74                | 6.84 | 101.5 ± 2.70               | 2.66 | 102.8 ± 0.37               | 0.36 | 99.0 ± 3.03                                      | 3.06 | 104.3 ± 2.97                                     | 2.85 |
| LEN              | QC-H     | 105.6 ± 0.63               | 0.59 | 106.0 ± 2.55               | 2.41 | 107.5 ± 3.02               | 2.81 | 92.5 ± 3.99                                      | 4.32 | 100.5 ± 2.44                                     | 2.43 |
|                  | QC-L     | 103.8 ± 4.83               | 4.65 | 109.0 ± 6.64               | 6.09 | 105.3 ± 2.77               | 2.64 | 98.4 ± 1.48                                      | 1.50 | 97.8 ± 0.80                                      | 0.82 |
| NIL              | QC-H     | 97.0 ± 7.29                | 7.52 | 100.9 ± 2.94               | 2.91 | 100.6 ± 4.21               | 4.18 | 92.3 ± 5.27                                      | 5.71 | 98.9 ± 1.65                                      | 1.67 |
|                  | QC-L     | 97.5 ± 6.31                | 6.48 | 98.3 ± 4.01                | 4.08 | 102.3 ± 5.93               | 5.79 | 99.4 ± 4.76                                      | 4.79 | 98.6 ± 2.45                                      | 2.49 |
| OSI <sup>a</sup> | QC-H     | 93.5 ± 1.47                | 1.57 | 92.8 ± 2.97                | 3.20 | 89.5 ± 1.02                | 1.14 | 89.8 ± 1.47                                      | 1.63 | 89.5 ± 0.49                                      | 0.55 |
|                  | QC-L     | 91.8 ± 1.49                | 1.63 | 90.5 ± 2.36                | 2.61 | 81.5 ± 2.46                | 3.02 | 92.4 ± 3.31                                      | 3.58 | 91.9 ± 4.82                                      | 5.25 |
| RUX              | QC-H     | 98.6 ± 2.02                | 2.05 | 96.3 ± 7.12                | 7.40 | 98.4 ± 2.35                | 2.39 | 92.3 ± 6.13                                      | 6.64 | 96.1 ± 0.50                                      | 0.52 |
|                  | QC-L     | 98.6 ± 4.65                | 4.72 | 102.5 ± 1.76               | 1.72 | 103.3 ± 2.38               | 2.31 | 95.8 ± 1.04                                      | 1.08 | 101.8 ± 1.40                                     | 1.38 |
| TRA              | QC-H     | 100.4 ± 0.50               | 0.50 | 103.7 ± 0.28               | 0.89 | 100.9 ± 1.33               | 1.32 | 93.6 ± 9.69                                      | 10.3 | 100.5 ± 1.00                                     | 0.99 |
|                  | QC-L     | 100.8 ± 3.70               | 3.67 | 96.9 ± 1.47                | 5.72 | 101.5 ± 0.82               | 0.81 | 102.6 ± 7.16                                     | 6.98 | 101.1 ± 4.98                                     | 4.93 |

<sup>a</sup> long term stability was only assessed for four weeks in the case of OSI: -20 °C and -80 °C

**Table S6** Validation results for stock solution (SL) in DMSO and working solution in methanol (WSL) stability

| Analyte | <i>WSL in methanol for 4 months</i> |           | <i>SL in DMSO for 4 months</i> |           |
|---------|-------------------------------------|-----------|--------------------------------|-----------|
|         | Accuracy [%]                        | CV% (n=3) | Accuracy [%]                   | CV% (n=3) |
| AFA     | 87.6 ± 0.51                         | 0.58      | 82.8 ± 1.23                    | 1.49      |
| BOS     | 102.2 ± 3.04                        | 2.97      | 99.2 ± 1.25                    | 1.26      |
| CAB     | 95.1 ± 3.78                         | 3.97      | 89.2 ± 2.89                    | 3.24      |
| DAB     | 92.0 ± 2.89                         | 3.14      | 88.2 ± 4.33                    | 4.91      |
| LEN     | 108.1 ± 2.93                        | 2.71      | 109.0 ± 3.47                   | 3.18      |
| NIL     | 96.8 ± 5.09                         | 5.26      | 99.6 ± 2.40                    | 2.41      |
| OSI     | 109.4 ± 2.45                        | 2.24      | 105.3 ± 5.05                   | 4.80      |
| RUX     | 93.8 ± 5.03                         | 5.36      | 95.0 ± 3.82                    | 4.02      |
| TRA     | 100.0 ± 2.71                        | 2.71      | 103.2 ± 0.85                   | 0.82      |

**Table S7** Co-medication and additional condition of the patients taking OSI and AFA

|            |                                                                                                       |                                                                                                                                                            |                          |
|------------|-------------------------------------------------------------------------------------------------------|------------------------------------------------------------------------------------------------------------------------------------------------------------|--------------------------|
| <b>OSI</b> | <b>Patient 1</b>                                                                                      | Candesartan 24 mg QD,<br>Hydrochlorothiazide 12.5 mg QD<br>Crizotinib 250 mg BID (8/14)*<br>Zolendronat every 8 weeks                                      | Arterial hypertension    |
|            | <b>Patient 2</b>                                                                                      | Zolendronate every 6 weeks<br>Crizotinib 250 mg BID (3/11)*<br>Zolendronate every 6 weeks<br>Enoxaparin sodium (50.000 IE/5 mL) 0.4 mL BID                 | No additional conditions |
| <b>AFA</b> | Levothyroxine 100 µg<br>Doxycycline 50 mg QD (short-time therapy)<br>no further medication documented | Condition after thyroidectomy after papillary carcinoma of the thyroid, arterial hypertension and mitral regurgitation (Grade II classified by Carpentier) |                          |

\* ratio of samples (x/total) taken during the combination of the two kinase-inhibitors (osimertinib and crizotinib)

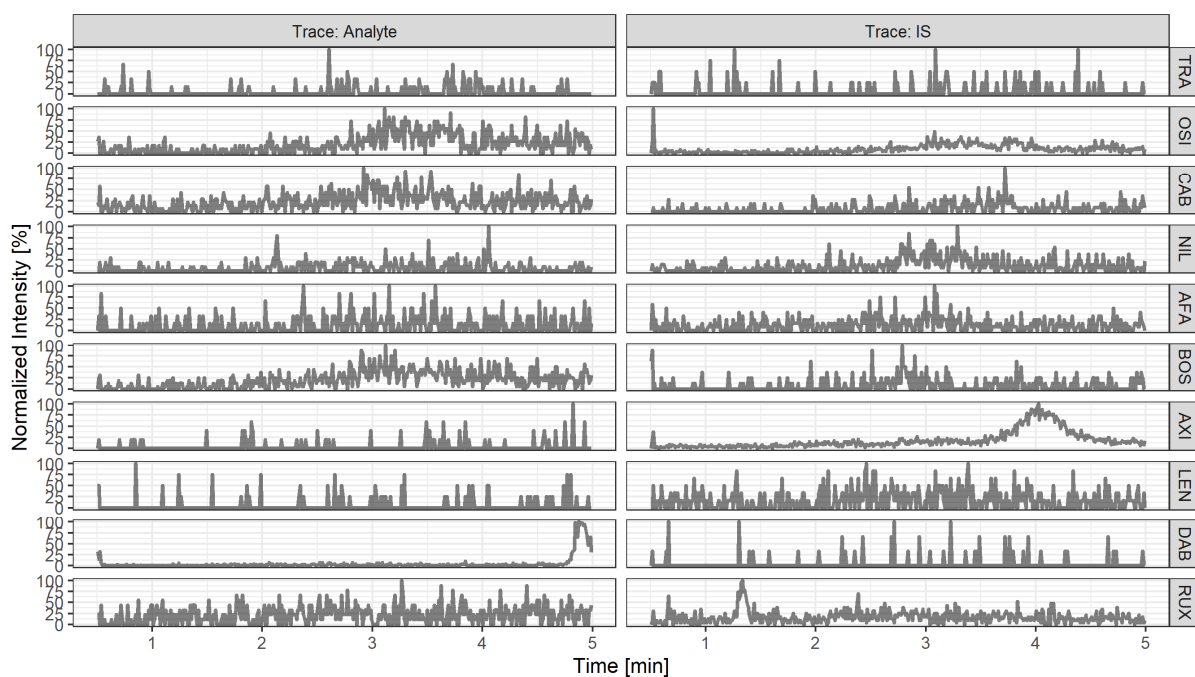

**Fig. S1** Chromatographic traces of all monitored MRM transitions in a blank sample

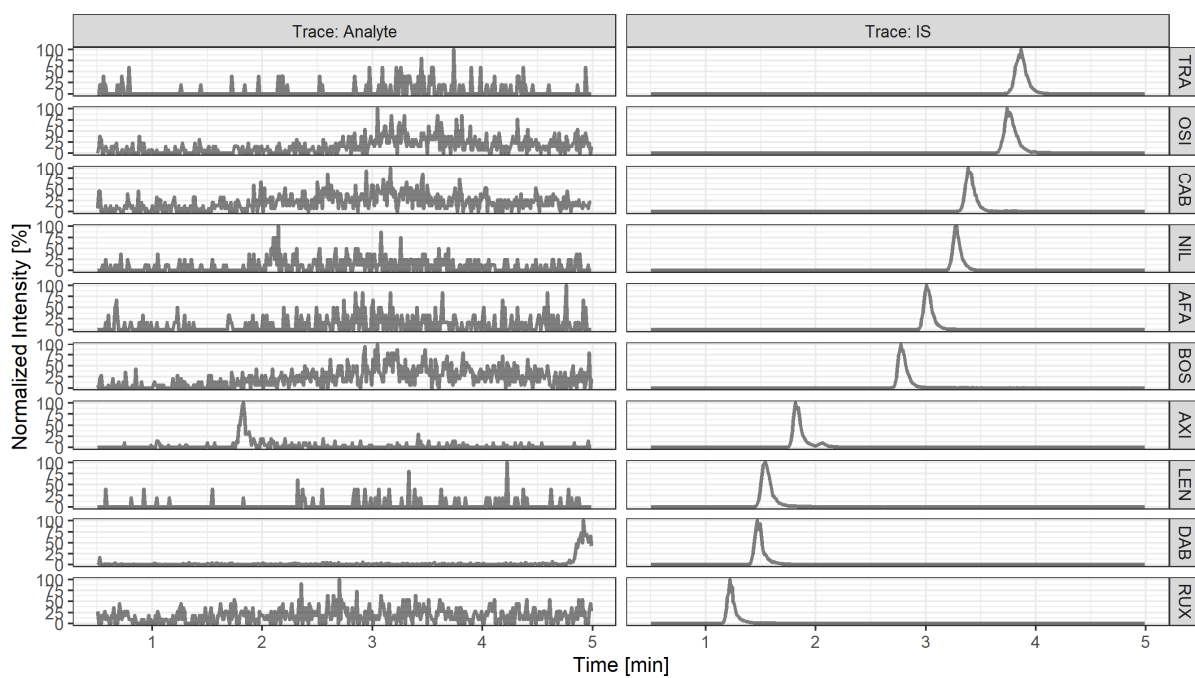

**Fig. S2** Chromatographic traces of all monitored MRM transitions in a blank sample containing internal standards

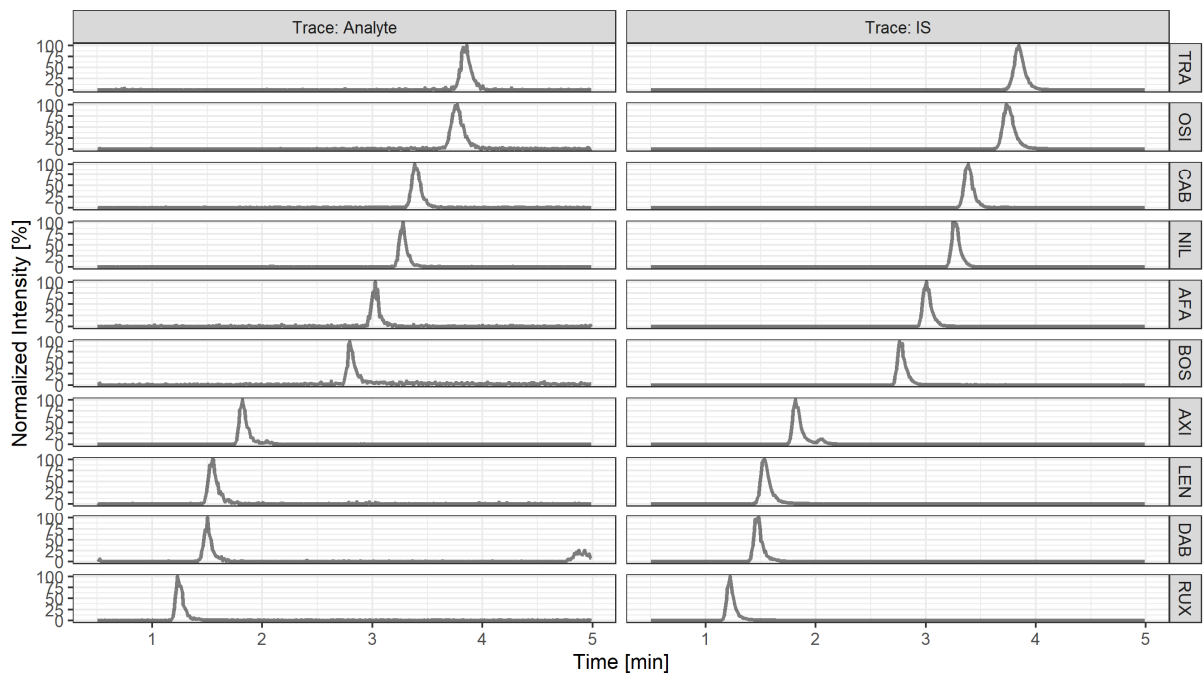

**Fig. S3** Chromatographic traces of all monitored MRM transitions in an LLOQ sample
